# Supplementary material for: The endothelin B receptor plays a crucial role in the adhesion of neutrophils to the endothelium in sickle cell disease
Source: PubMed Central journal article supplement — Haematologica. 2017 Apr 6;102(7):1161–72. doi: 10.3324/haematol.2016.156869 (PMC5566019; doi:10.3324/haematol.2016.156869), 2017-07
Supplement: 2016_156869-Disclosures_and_Contributions.pdf [file 2016_156869-Disclosures_and_Contributions.pdf]

Haematologica  
HAEMATOL/2016/156869  
Version 4

The endothelin B receptor plays a crucial role for the adhesion of neutrophils to the endothelium in sickle cell disease

Bérengère Koehl, Pierre Nivoit, Wassim El Nemer, Olivia Lenoir, Patricia Hermand, Catia Pereira, Valentine Brousse, Léa Guyonnet, Giulia Ghinatti, Malika Benkerrou, Yves Colin, Caroline Le Van Kim, and Pierre-Louis Tharaux

Disclosures: None

Contributions: B.K. and P.N. designed and performed research, analyzed data and wrote the manuscript; W.E.N designed and performed research, and reviewed the manuscript; BK, PN, OL and WEN are equally first contributing authors. C.P., P.H. and L.G. performed flow cytometry experiments and analyzed data; V.B. and M.B. provided blood samples; L.G., G.G., O.L. bred and genetically characterized the transgenic mice; O.L. and Y.C.A. reviewed the manuscript, C.L.V.K and PLT designed research and wrote the manuscript. CLVK and PLT are equally contributing and corresponding authors
